CORRECTION

# Correction: Neurally Encoding Time for Olfactory Navigation

The *PLOS Computational Biology* Staff

An error was introduced during the typesetting process. There are two typographical errors in the x-axis label in [Fig 2](#). The publisher apologizes for these errors.

Please view the correct version of [Fig 2](#) here:

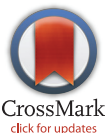

click for updates

## OPEN ACCESS

**Citation:** The *PLOS Computational Biology* Staff (2016) Correction: Neurally Encoding Time for Olfactory Navigation. *PLoS Comput Biol* 12(1): e1004742. doi:10.1371/journal.pcbi.1004742

**Published:** January 27, 2016

**Copyright:** © 2016 The PLOS Computational Biology Staff. This is an open access article distributed under the terms of the [Creative Commons Attribution License](#), which permits unrestricted use, distribution, and reproduction in any medium, provided the original author and source are credited.

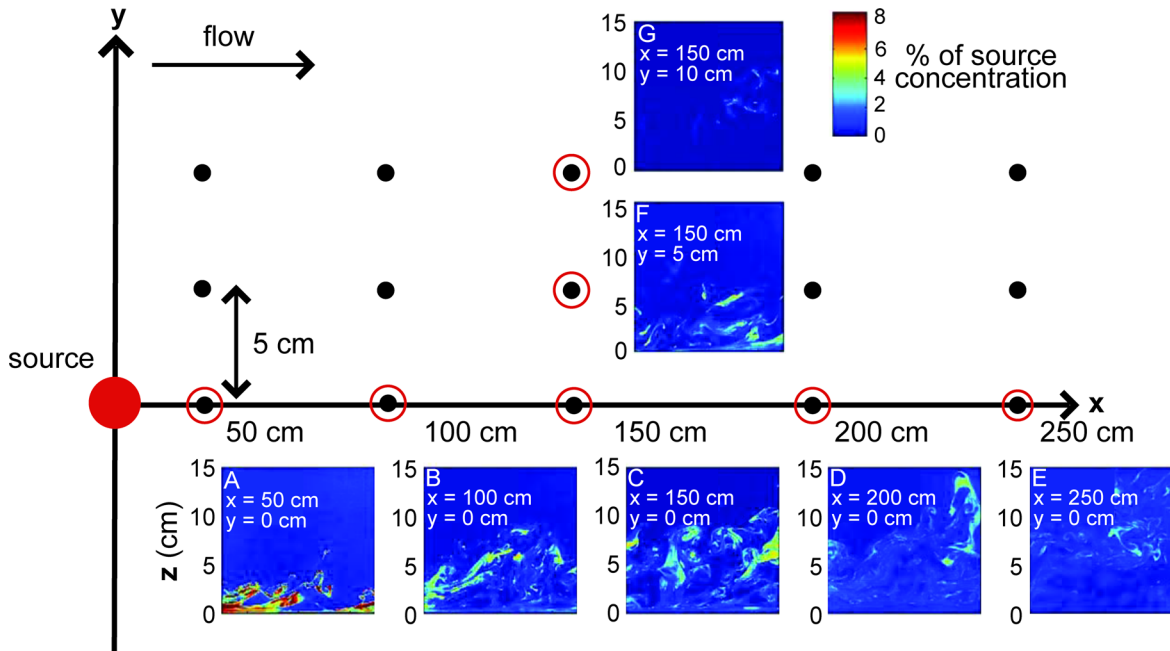

**Fig 2. Odor plume PLIF videos taken at 15 locations.** Instantaneous odor concentration (expressed as % of source concentration) at (A)  $x = 50$  cm, (B)  $x = 100$  cm, (C)  $x = 150$  cm, (D)  $x = 200$  cm, (E)  $x = 250$  cm from the source along the odor plume centerline, and (F)  $y = 5$  cm, (G)  $y = 10$  cm from the odor plume centerline at  $x = 150$  cm.

doi:10.1371/journal.pcbi.1004742.g001

## Reference

1. Park IJ, Hein AM, Bobkov YV, Reidenbach MA, Ache BW, Principe JC (2016) Neurally Encoding Time for Olfactory Navigation. *PLoS Comput Biol* 12(1): e1004682. doi:[10.1371/journal.pcbi.1004682](https://doi.org/10.1371/journal.pcbi.1004682) PMID: [26730727](https://pubmed.ncbi.nlm.nih.gov/26730727/)
